# Supplementary material
Source: MDPI journal article supplement (https://www.mdpi.com/2304-6740/10/11/202)
Supplement: s1 [file s1]

## A 2D porous zinc-organic framework platform for loading of 5-Fluorouracil

Liang Qin <sup>1</sup>, Fenglan Liang <sup>2,\*</sup>, Yan Li <sup>1</sup>, Jiana Wu <sup>1</sup>, Shiyuan Guan <sup>1</sup>, Meiyin Wu <sup>1</sup>, Shiling Xie <sup>1</sup>, Manshi Luo <sup>1</sup>, and Deyun Ma <sup>1,\*</sup>

<sup>1</sup> School of Food and Pharmaceutical Engineering, Zhaoqing University, Zhaoqing 526061, P. R. China

<sup>2</sup> College of Life Science, Zhaoqing University, Zhaoqing 526061, P. R. China

\* Correspondence: mady@zqu.edu.cn and liangfl82@126.com

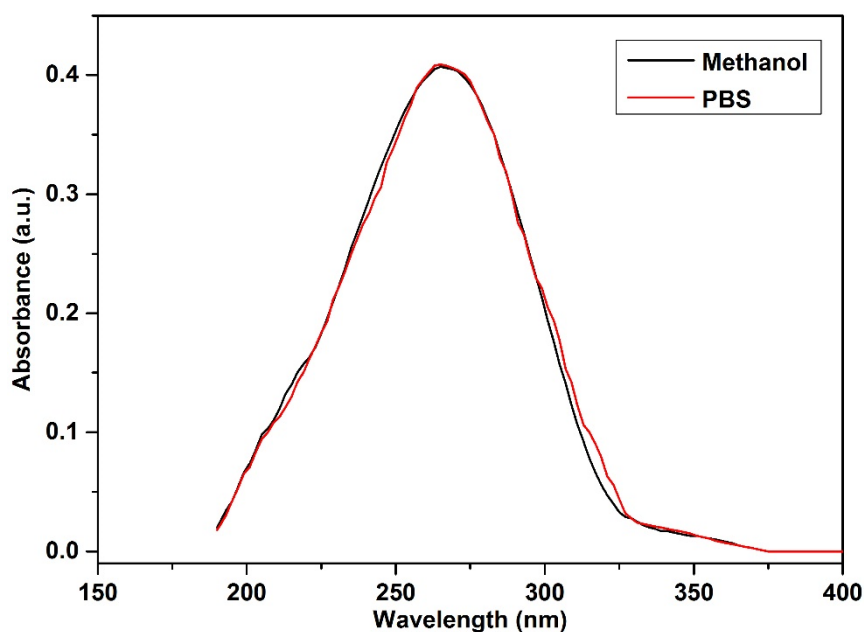

Figure S1. UV absorption curves of 5-FU in methanol and PBS, respectively.

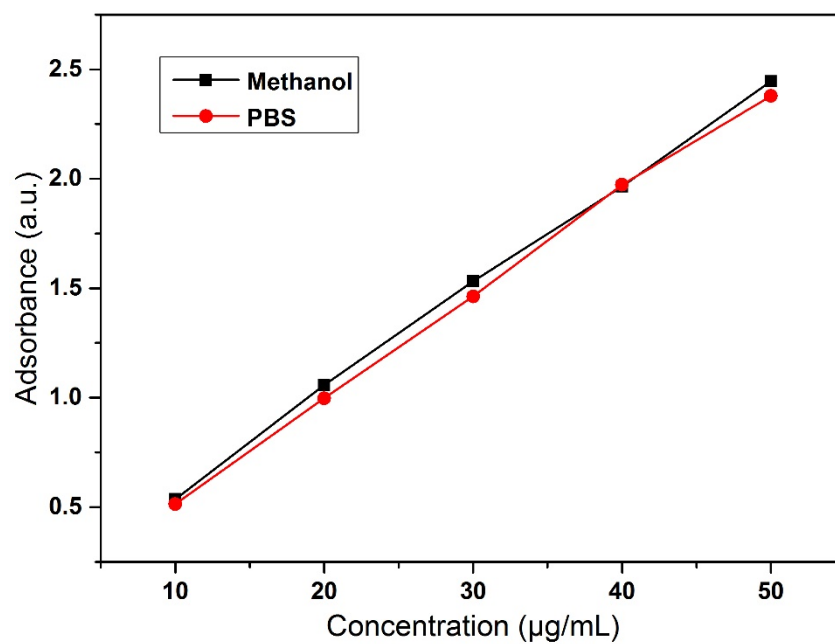

**Figure S2.** Linear regression curves of concentration versus absorbance of 5-Fu measured at 265 nm.

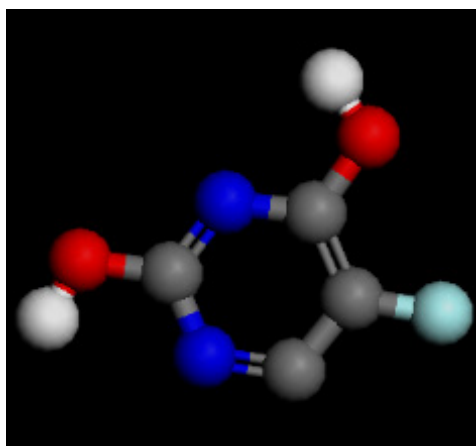

**Figure S3.** Optimized geometries of 5-FU within the pore of 1a.
